# Supplementary material for: Safety and Efficacy of Transurethral Focal Laser Ablation Versus Transurethral Resection of the Prostate in the Management of Benign Prostatic Obtruction: A Prospective Randomized Study with One Year Follow Up
Source: Research Square preprint supplement (doi:10.21203/rs.3.rs-7488879/v1), 2025-10-12
Supplement: Supplementary file 1 [file 1e2519704d70b28f9e3a0858.docx]

**Table (1):** Preoperative patients parameters.

|  | | Group | | Test of significance | |
| --- | --- | --- | --- | --- | --- |
| TU-FLAP | M TURP |
| Mean ± SD Num. (%) | Mean ± SD Num. (%) | P-Value | Sig. |
| Age | | 66.32 ± 7.58 | 63.13 ± 9.23 | 0.196* | NS |
| Prostatic Volume | | 56.98 ± 12.86 | 59.52 ± 11.31 | 0.472* | NS |
| Serum PSA | | 3.7 ± 2.79 | 4.15 ± 2.07 | 0.530* | NS |
| Retention | No | 13 (52%) | 15 (65.22%) | 0.353** | NS |
| Yes | 12 (48%) | 8 (34.78%) |

*Student t- test of significance, **Chi-Square test of significance.

**Table (2)**: Operative data of the patients

|  | Group | | Student t-test | |
| --- | --- | --- | --- | --- |
| TU-FLAP | M TURP |
| Mean ± SD | Mean ± SD | P-Value | Sig. |
| Time of operation (mins) | 30.24 ± 4.95 | 56.96 ± 6.44 | <0.001 | S |
| Hospital stay (days) | 1.12 ± 0.44 | 3.17 ± 0.49 | <0.001 | S |
| Catheter duration (days) | 5.56 ± 0.77 | 3.17 ± 0.39 | <0.001 | S |

**Table (3):** Perioperative Laboratory investigations

|  | Group | | | | Student t-test | |
| --- | --- | --- | --- | --- | --- | --- |
| TU-FLAP | | ­­­­­M TURP | |
| Mean ± SD | % of change | Mean ± SD | % of change | P-Value | Sig. |
| Hb-preoperative | 13.46 ± 1.23 |  | 13.22 ± 1.36 |  | 0.527 | NS |
| Hb -postoperative | 13.24 ± 1.32 | -1.69% | 12.22 ± 1.35 | -7.59% | 0.011 | S |
| Na-preoperative | 139.04 ± 2.51 |  | 139.87 ± 3.31 |  | 0.330 | NS |
| Na-postoperative | 138.52 ± 2.18 | -0.36% | 136.13 ± 5.24 | -2.67% | 0.052 | NS |
| K-preoperative | 4.1 ± 0.41 |  | 4.45 ± 0.72 |  | 0.053 | NS |
| K-postoperative | 4.04 ± 0.44 | -1.28% | 4.19 ± 0.69 | -5.15% | 0.388 | NS |

**Table (4)**: Changes in follow up parameters overtime

|  | Group | | | | Test of significance | |
| --- | --- | --- | --- | --- | --- | --- |
| TU-FLAP | | M TURP | |
| Mean ± SD Median (IQR) | % of change | Mean ± SD Median (IQR) | % of change | P-Value | Sig. |
| Q-max |  | | | |  | |
| Baseline | 6.11 ± 5.87 |  | 5.48 ± 4.17 |  | 0.667* | NS |
| 1 month | 11.08 ± 2.91 | 64.26% | 14.43 ± 1.67 | 89.77% | <0.001* | S |
| 3 months | 15.5 ± 1.57 | 79.92% | 15.96 ± 1.58 | 97.65% | 0.321* | NS |
| 12 months | 17.54 ± 2.96 | 99.67% | 19.13 ± 2.2 | 124.23% | 0.042* | S |
| IPSS |  | | | |  | |
| Baseline | 24.44 ± 5.16 |  | 25.3 ± 4.67 |  | 0.547* | NS |
| 1 month | 18.52 ± 4.77 | -24.39% | 11.83 ± 3.28 | -53.25% | <0.001* | S |
| 3 months | 10.08 ± 3.55 | -59.14% | 5.52 ± 1.38 | -78.20% | <0.001* | S |
| 12 months | 5.32 ± 2.04 | -78.56% | 5.3 ± 1.46 | -79.07% | 0.976* | NS |
| PVR |  | | | |  | |
| Baseline | 150 (82 - 750) |  | 131 (90 - 400) |  | 0.901** | NS |
| 1 month | 70 (55 - 180) | -45.45% | 10 (4 - 25) | -94.00% | <0.001** | S |
| 3 months | 20 (8 - 70) | -91.43% | 5 (0 - 15) | -95.52% | 0.012** | S |
| 12 months | 12 (4 - 40) | -95.00% | 4 (0 - 20) | -98.72% | 0.076** | NS |
| QoL |  | | | |  | |
| Baseline | 4.76 ± 0.72 |  | 4.83 ± 0.83 |  | 0.770* | NS |
| 1 month | 3.64 ± 0.81 | -23.60% | 2.57 ± 0.51 | -45.14% | <0.001* | S |
| 3 months | 2.76 ± 0.6 | -41.80% | 2.52 ± 0.51 | -46.23% | 0.146* | NS |
| 12 months | 1.96 ± 0.61 | -58.80% | 2 ± 0.52 | -57.46% | 0.809* | NS |
| PSA |  | | | |  | |
| Baseline | 3.49 ± 2.49 |  | 4.15 ± 2.07 |  | 0.323* | NS |
| 1 months | 3.26 ± 1.9 | 3.95% | 2.5 ± 1.22 | -38.32% | 0.107* | NS |
| 3 months | 2.58 ± 1.45 | -19.61% | 1.5 ± 0.63 | -60.10% | 0.002* | S |
| IIEF |  | | | |  | |
| Baseline | 9.32 ± 3.06 |  | 10.13 ± 3.65 |  | 0.408* | NS |
| 3 months | 12.4 ± 3 | 38.81% | 10.13 ± 2.91 | 2.19% | 0.011* | S |
| 12 months | 13 ± 3.28 | 47.02% | 10.43 ± 3.19 | 6.27% | 0.009* | S |
| Prostate size |  | | | |  | |
| Baseline | 56.98 ± 12.86 |  | 59.52 ± 11.31 |  | 0.472* | NS |
| 12 months | 45.08 ± 10 | -20.48% | 24.22 ± 4.74 | -58.55% | <0.001* | S |

*Student t- test of significance, **Mann-Whitney test of significance.

**Table 5**: Postoperative Complications Classified by Clavien-Dindo System

| Complication | Group | Clavien-Dindo Grade | No. of Patients (%) | P-Value | Significance |
| --- | --- | --- | --- | --- | --- |
| Haematuria | TU-FLAP | - | 0 (0%) |  |  |
|  | M-TURP | Grade I | 1 (4.35%) | 0.479 | NS |
| Dysuria | TU-FLAP | Grade I | 3 (12%) |  |  |
|  | M-TURP | Grade I | 3 (13.04%) | 1.000 | NS |
| Urinary Tract Infection (UTI) | TU-FLAP | Grade II | 2 (8%) |  |  |
|  | M-TURP | Grade II | 3 (13.04%) | 0.660 | NS |
| Urinary Retention | TU-FLAP | Grade IIIa | 3 (12%) |  |  |
|  | M-TURP | - | 0 (0%) | 0.235 | NS |
| Retrograde Ejaculation | TU-FLAP | - | 0 (0%) |  |  |
|  | M-TURP | Grade I | 20 (86.96%) | <0.001 | S |
| Incontinence | TU-FLAP | - | 0 (0%) |  |  |
|  | M-TURP | - | 0 (0%) |  |  |
| Retreatment | TU-FLAP | Grade IIIb | 3 (12%) |  |  |
|  | M-TURP | - | 0 (0%) | 0.235 | NS |
| Prostatic Abscess | TU-FLAP | Grade II | 1 (4%) |  |  |
|  | M-TURP | - | 0 (0%) | 1.000 | NS |

**List of tables:**

**Table (1):** Preoperative parameters, including age, prostate volume, urinary retention, and PSA levels, were comparable between groups with no significant differences (p > 0.05).

**Table (2):** Operative time and hospital stay were significantly longer in the M-TURP group, while catheterization duration was longer in the TU-FLAP group (p < 0.001).

**Table (3):** Perioperative labs showed no significant differences between groups, except for a greater postoperative hemoglobin drop in the M-TURP group (p < 0.05).

**Table (4):** Both groups showed significant 12-month improvements. M-TURP had greater gains in Qmax, PSA, and prostate volume, while TU-FLAP showed superior IIEF improvement. No significant differences were found in IPSS, PVR, or QoL.

**Table (5):** Clavien-Dindo classification showed TU-FLAP had a comparable or better safety profile with fewer functional complications than M-TURP.
